# Supplementary material
Source: Springer Nature journal article supplement (https://www.springermedizin.de/resource/supplementary/12936_2013_3103_MOESM1_ESM.pdf/9545508)
Supplement: MOESM1 [file 9545508]

Annual Confirmed Malaria Cases

Annual Confirmed Malaria Deaths

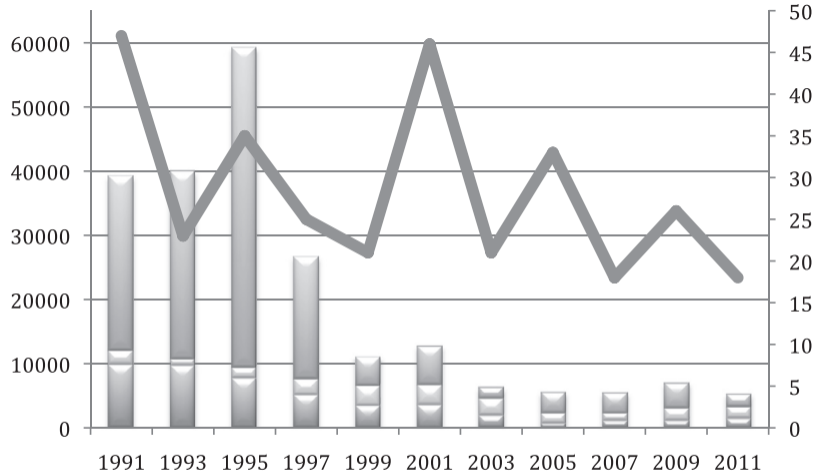

Legend: Peninsular Malaysia, Sarawak, Sabah, Labuan, Total Deaths
